# Supplementary material for: The NR4A2/VGF pathway fuels inflammation-induced neurodegeneration via promoting neuronal glycolysis
Source: PubMed Central journal article supplement (PMC11324305; doi:10.1172/jci177692), 2024-06-18
Supplement: jci-134-177692-s023.pdf [file jci-134-177692-s023.pdf]

Full unedited gel for Supplemental figure 1F

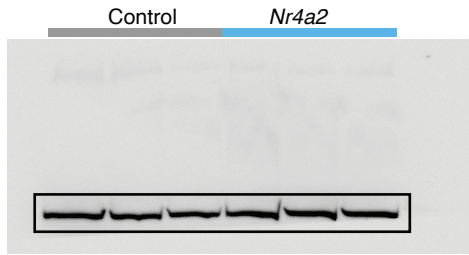

Vinculin

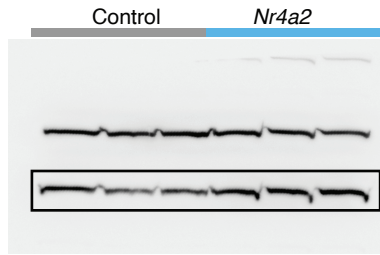

NR4A2

Full unedited gel for Supplemental figure 2F

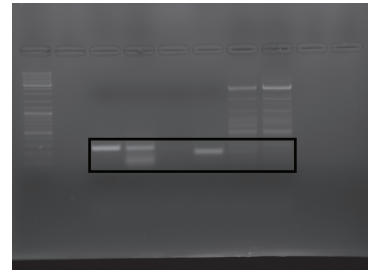

Full unedited gel for Figure 3B

EAE onset

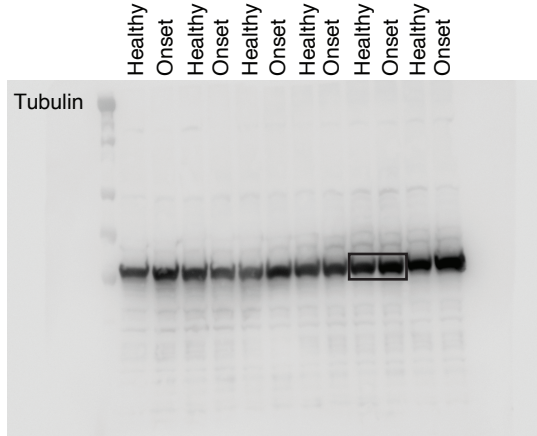

Tubulin

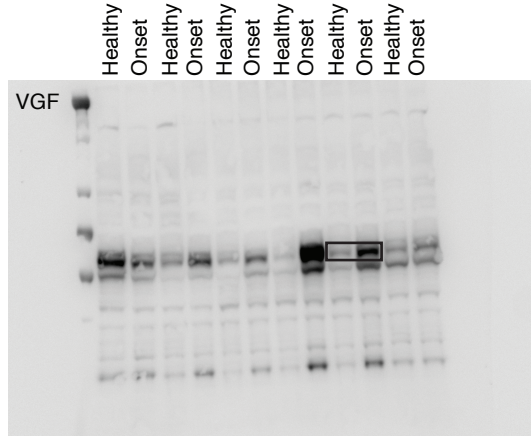

VGF

Acute EAE

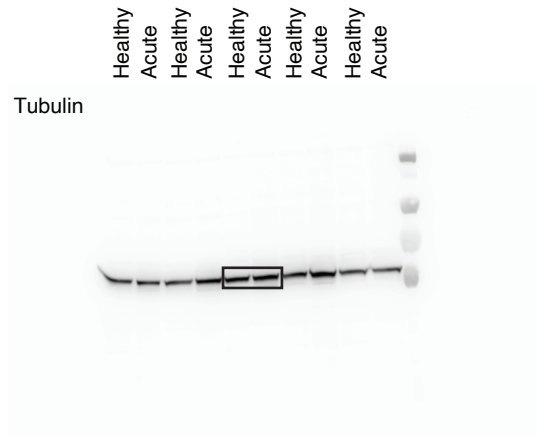

Tubulin

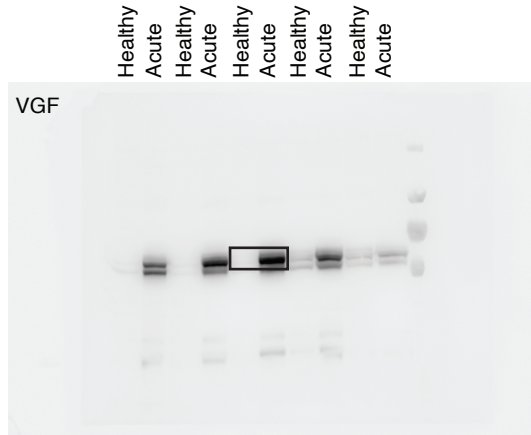

VGF

Chronic EAE

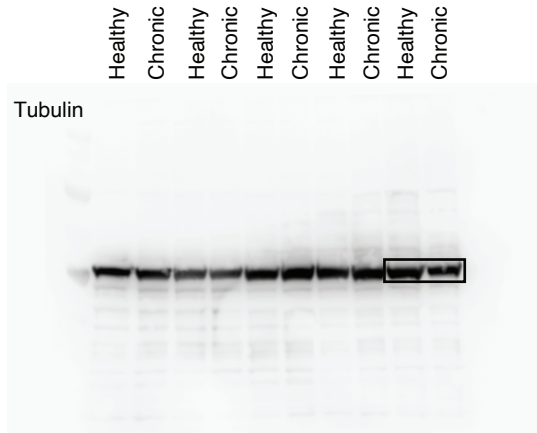

Tubulin

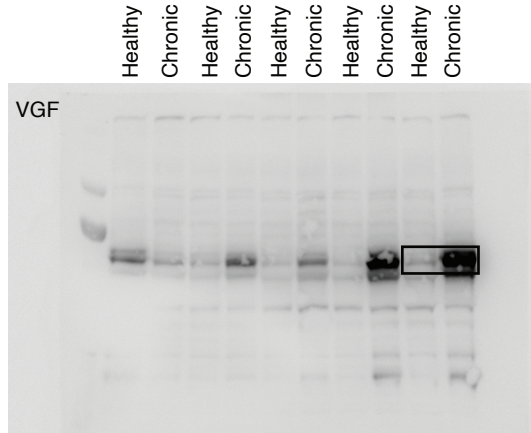

VGF

Full unedited gel for Supplemental figure 5E

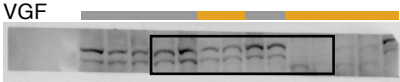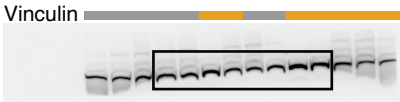

- WT
- *Vgf-cKO*
